# Supplementary material for: A MnO2nanosheets–o-phenylenediamine oxidative system for the sensitive fluorescence determination of alkaline phosphatase activity
Source: Royal Society of Chemistry journal article supplement (doi:10.1039/c8ay02061b), 2018-01-01
Supplement: c8ay02061b1.pdf [file c8ay02061b1.pdf]

## Supplementary Information

### **A MnO<sub>2</sub> nanosheets-o-phenylenediamine oxidative system for the sensitive fluorescent determination of alkaline phosphatase activity**

Xionghong Tan <sup>a,b,c</sup>, Zheng Li <sup>d</sup>, Yanlin Du <sup>a,b,c</sup>, Aixian Zheng <sup>c</sup>, Yongyi Zeng <sup>c</sup>, Xiaolong Zhang <sup>c,\*</sup>,  
Xiaolong Liu <sup>b,c,\*</sup>, and Niancai Peng <sup>d,\*</sup>

<sup>a</sup>College of Life Science, Fujian Agriculture and Forestry University, Fuzhou, Fujian 350002, P. R. China.

<sup>b</sup>Fujian Institute of Research on the Structure of Matter, Chinese Academy of Sciences, Fuzhou, Fujian 350002, P. R. China.

<sup>c</sup>The United Innovation of Mengchao Hepatobiliary Technology Key Laboratory of Fujian Province, Mengchao Hepatobiliary Hospital of Fujian Medical University, Fuzhou 350025, PR China.

<sup>d</sup>State Key Laboratory for Manufacturing System Engineering, School of Mechanical Engineering, Xi'an Jiaotong University, Xi'an 710049, P. R. China.

\*Corresponding Authors. E-mail addresses: [xiaolongdo@gmail.com](mailto:xiaolongdo@gmail.com) (X. Zhang), [xiaoloong.liu@gmail.com](mailto:xiaoloong.liu@gmail.com) (X. Liu), [pnc@mail.xjtu.edu.cn](mailto:pnc@mail.xjtu.edu.cn) (N. Peng)

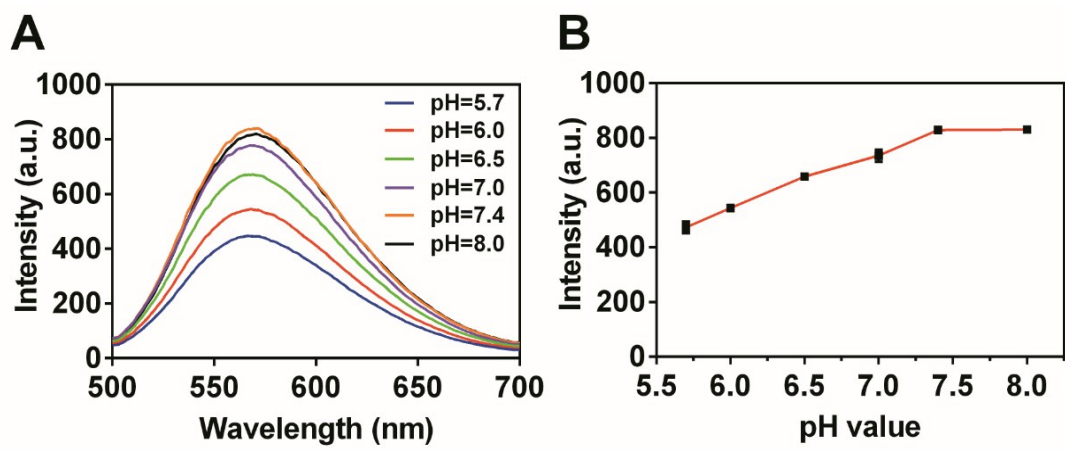

**Fig. S1** Effects of buffer pH value for the MnO<sub>2</sub> nanosheets-OPDA system. Fluorescence emission spectra (A) and the curve for fluorescence intensity in response to pH (B). Concentrations: OPDA, 75 μM; MnO<sub>2</sub>, 12.5 μg/mL.

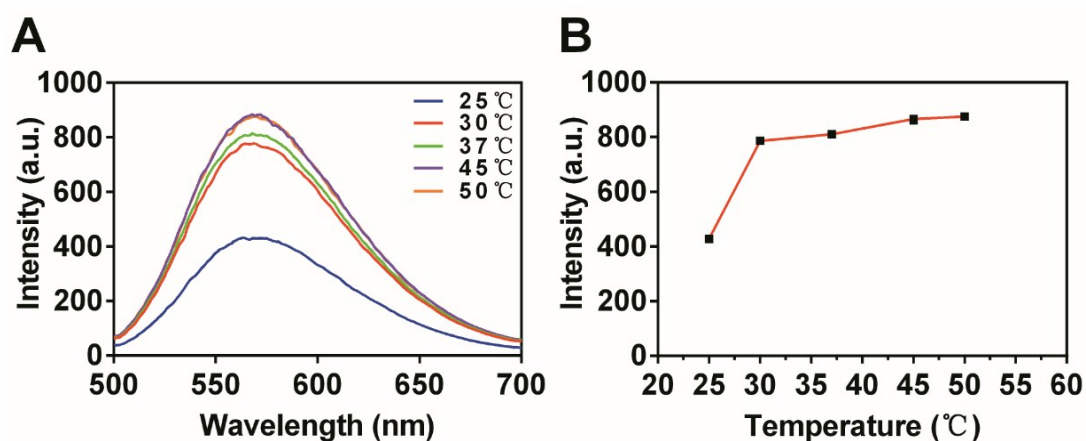

**Fig. S2** Fluorescence change of the MnO<sub>2</sub> nanosheets-OPDA system toward different temperature. Fluorescence emission spectra (A) and the curve for fluorescence intensity in response to temperature (B). Concentrations: OPDA, 75 μM; MnO<sub>2</sub>, 12.5 μg/mL.

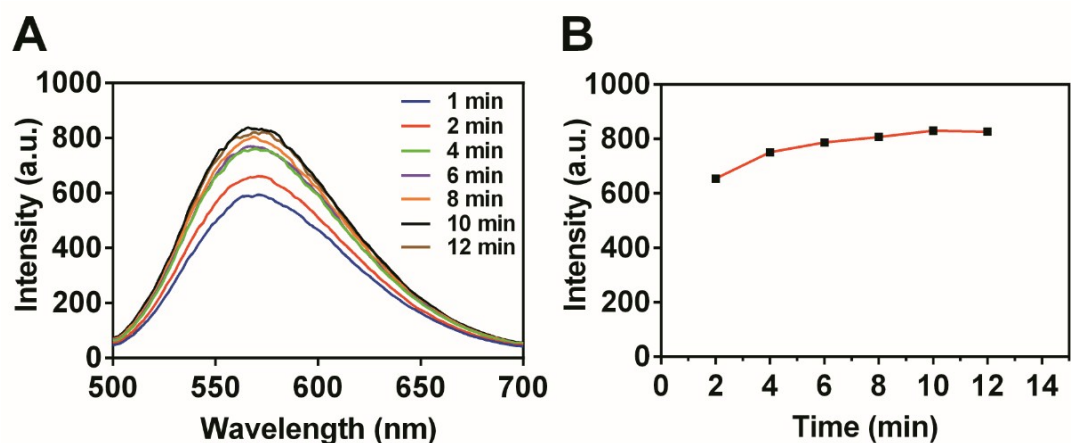

**Fig. S3** Effects of reaction time on the MnO<sub>2</sub> nanosheets-OPDA system. Fluorescence emission spectra (A) and the curve for fluorescence intensity in response to reaction time (B). Concentrations: OPDA, 75 μM; MnO<sub>2</sub>, 12.5 μg/mL.

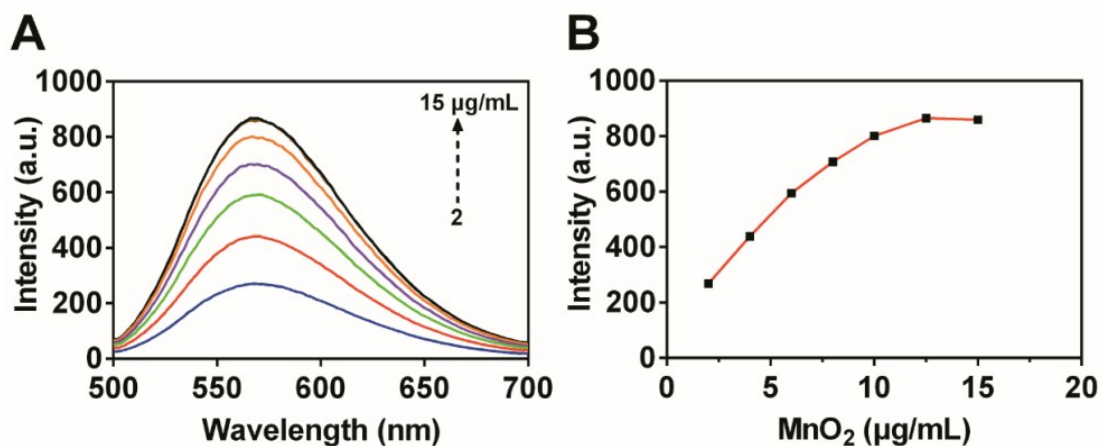

**Fig. S4** Catalytic reactivity of the MnO<sub>2</sub> with different concentrations in the MnO<sub>2</sub> nanosheets-OPDA sensing system. Fluorescence emission spectra (A) and the curve for fluorescence intensity in response to MnO<sub>2</sub> with various concentrations (B). Concentrations: OPDA, 75 μM; MnO<sub>2</sub>, 2, 4, 6, 8, 10, 12.5, 15 μg/mL.

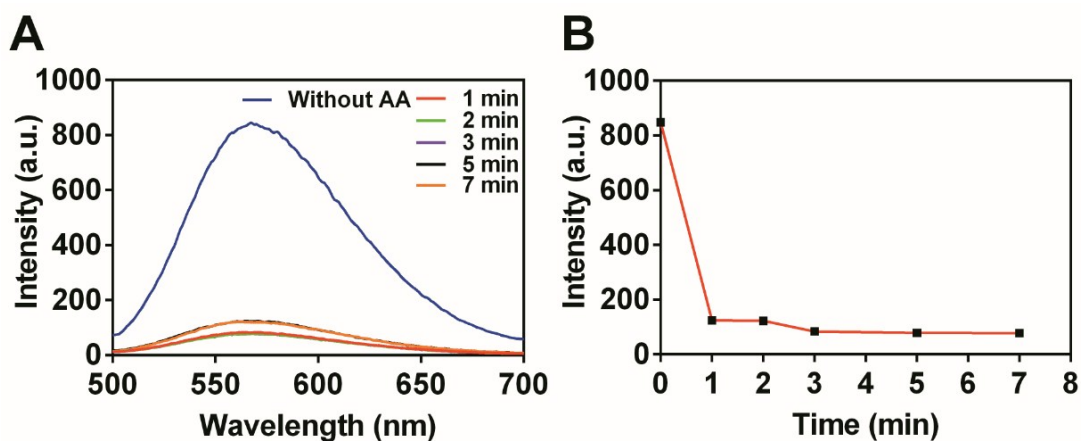

**Fig. S5** Effects of incubation time between MnO<sub>2</sub> nanosheets and AA on the fluorescence emission spectra of MnO<sub>2</sub> nanosheets-OPDA system (A) and the corresponding curve for fluorescence change (B). Concentrations: OPDA, 75  $\mu$ M; MnO<sub>2</sub>, 12.5  $\mu$ g/mL; AA, 400 U/L.

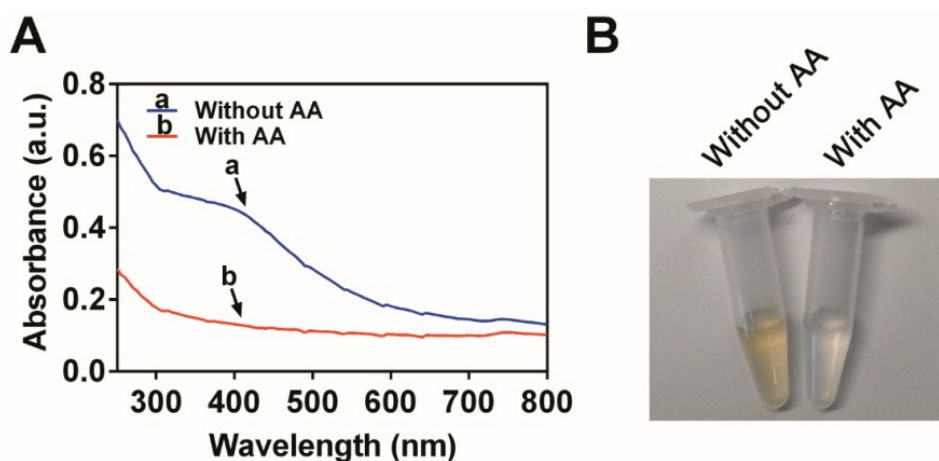

**Fig. S6** The UV-vis absorption spectra (A) and corresponding photographs (B) of MnO<sub>2</sub> nanosheets solution before and after AA treatment. Concentrations: MnO<sub>2</sub>, 12.5  $\mu$ g/mL; AA, 50  $\mu$ M.

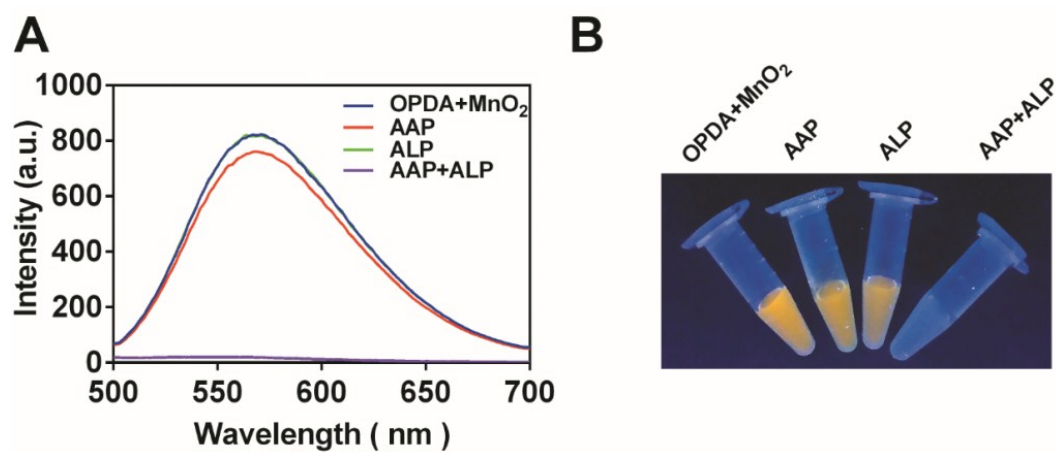

**Fig. S7** The effect of AAP or ALP alone, AAP and ALP on fluorescence emission spectra (A) of MnO<sub>2</sub> nanosheets-OPDA sensing system and corresponding photographs (B). Concentrations: OPDA, 75  $\mu$ M; MnO<sub>2</sub>, 12.5  $\mu$ g/mL; AAP, 5 mM; ALP, 600 U/L.

**Table S1.** Comparison of ALP assay in analytical performance.

| Materials                                                      | Detection method         | Linear range<br>(U/L) | Detection limit<br>(U/L) | Reference |
|----------------------------------------------------------------|--------------------------|-----------------------|--------------------------|-----------|
| DNA-Cu(II) complexes                                           | Colorimetric method      | 20-200                | 0.84                     | S1        |
| Cu <sup>2+</sup> -modulated G-<br>Quadruplex-based<br>DNAzymes | Colorimetric method      | 0.07–100              | 0.07                     | S2        |
| CdSe quantum dots                                              | Electrochemiluminescence | 2–25                  | 2                        | S3        |
| p-nitrophenyl<br>phosphate                                     | Electrochemistry         | 0.4-2000              | 0.3                      | S4        |
| CuS/GR                                                         | Electrochemistry         | 0.1-100               | 0.02                     | S5        |
| p-nitrophenyl<br>phosphate                                     | Electrochemistry         | 5-250                 | 0.5                      | S6        |
| Polymer nanoparticles                                          | Fluorescence             | 25–200                | 10                       | S7        |
| Carbon dots                                                    | Fluorescence             | 0.01–25               | 0.001                    | S8        |
| CDs–MnO <sub>2</sub>                                           | Fluorescence             | 1-100                 | 0.4                      | S9        |
| F-PDA–MnO <sub>2</sub>                                         | Fluorescence             | 1-80                  | 0.34                     | S10       |
| MnO <sub>2</sub> nanosheets-<br>OPDA                           | Fluorescence             | 0.1-200               | 0.1                      | This work |

## References

- (S1) J. Yang, L. Zheng, Y. Wang, W. Li, J. Zhang, J. Gu and Y. Fu, *Biosensors & Bioelectronics*, **2015**, *77*, 549-556.
- (S2) Z. Tang, H. Zhang, C. Ma, P. Gu, G. Zhang, K. Wu, M. Chen and K. Wang, *Microchimica Acta*, **2018**, *185*, 109.
- (S3) H. Jiang and X. Wang, *Analytical Chemistry*, **2012**, *84*, 6986-6993.
- (S4) W. Sun and K. Jiao, *Bulletin of the Chemical Society of Ethiopia*, **2005**, *19*, 163-173.
- (S5) J. Peng, X. X. Han, Q. C. Zhang, H. Q. Yao and Z. N. Gao, *Analytica chimica acta*, **2015**, *878*, 87-94.
- (S6) S. Qin, *International Journal of Electrochemical Science*, **2017**, 8908-8917.
- (S7) J. Deng, Y. Ping, Y. Wang and L. Mao, *Analytical Chemistry*, **2015**, *87*, 3080-3086.
- (S8) G. Li, H. Fu, X. Chen, P. Gong, G. Chen, L. Xia, H. Wang, J. M. You and Y. Wu, *Analytical Chemistry*, **2016**, *88*, 2720.
- (S9) F. Qu, H. Pei, R. Kong, S. Zhu and X. Lian, *Talanta*, **2016**, *165*, 136.
- (S10) T. Xiao, J. Sun, J. Zhao, S. Wang, G. Liu and X. Yang, *Acs Applied Materials & Interfaces*, **2018**, *10*, 6560-6569.
